# Supplementary material for: Nr6a1 controls Hox expression dynamics and is a master regulator of vertebrate trunk development
Source: PubMed Central journal article supplement (PMC9755267; doi:10.1038/s41467-022-35303-4), 2022-12-15
Supplement: 41467_2022_35303_MOESM3_ESM.pdf [file 41467_2022_35303_MOESM3_ESM.pdf]

## Description of Additional Supplementary Files

File name: **Supplementary Data 1**

Description: ToppGene and DAVID analysis of *Nr6a1*<sup>-/-</sup> embryos compared to controls.

File name: **Supplementary Data 2**

Description: Differentially expressed genes (FDR<0.05) uniquely identified in *Cdx2P:Nr6a1* tailbuds, uniquely identified in *Gdf11*<sup>-/-</sup> tailbuds, or common to both *Cdx2P:Nr6a1* and *Gdf11*<sup>-/-</sup> tailbuds.
